# Cell-Intrinsic NF- $\kappa$ B Activation Is Critical for the Development of Natural Regulatory T Cells in Mice

Eva Gückel<sup>1</sup>, Silke Frey<sup>1</sup>, Mario M. Zaiss<sup>2</sup>, Georg Schett<sup>2</sup>, Sankar Ghosh<sup>3</sup>, Reinhard E. Voll<sup>1,2,4\*</sup>

**1** Clinical Research Group at Nikolaus Fiebiger Center of Molecular Medicine, Department of Internal Medicine 3, University Hospital Erlangen, Friedrich-Alexander University of Erlangen-Nürnberg, Erlangen, Germany, **2** Department of Internal Medicine 3, Rheumatology and Clinical Immunology, University Hospital Erlangen, Friedrich-Alexander University of Erlangen-Nürnberg, Erlangen, Germany, **3** Department of Microbiology and Immunology, College of Physicians and Surgeons, Columbia University, New York, New York, United States of America, **4** Department of Rheumatology and Clinical Immunology, Center for Chronic Immunodeficiency, University Medical Center Freiburg, Freiburg, Germany

## Abstract

**Background:** Naturally occurring CD4<sup>+</sup>CD25<sup>+</sup>Foxp3<sup>+</sup> regulatory T (Treg) cells develop in the thymus and represent a mature T cell subpopulation critically involved in maintaining peripheral tolerance. The differentiation of Treg cells in the thymus requires T cell receptor (TCR)/CD28 stimulation along with cytokine-promoted Foxp3 induction. TCR-mediated nuclear factor kappa B (NF- $\kappa$ B) activation seems to be involved in differentiation of Treg cells because deletion of components of the NF- $\kappa$ B signaling pathway, as well as of NF- $\kappa$ B transcription factors, leads to markedly decreased Treg cell numbers in thymus and periphery.

**Methodology/Principal Findings:** To investigate if Treg cell-intrinsic NF- $\kappa$ B activation is required for thymic development and peripheral homeostasis of Treg cells we used transgenic (Tg) mice with thymocyte-specific expression of a stable I $\kappa$ B $\alpha$  mutant to inhibit NF- $\kappa$ B activation solely within the T cell lineage. Here we show that Treg cell-intrinsic NF- $\kappa$ B activation is important for the generation of cytokine-responsive Foxp3<sup>+</sup> thymic Treg precursors and their further differentiation into mature Treg cells. Treg cell development could neither be completely rescued by the addition of exogenous Interleukin 2 (IL-2) nor by the presence of wild-type derived cells in adoptive transfer experiments. However, peripheral NF- $\kappa$ B activation appears to be required for IL-2 production by conventional T cells, thereby participating in Treg cell homeostasis. Moreover, pharmacological NF- $\kappa$ B inhibition via the I $\kappa$ B kinase  $\beta$  (IKK $\beta$ ) inhibitor AS602868 led to markedly diminished thymic and peripheral Treg cell frequencies.

**Conclusion/Significance:** Our results indicate that Treg cell-intrinsic NF- $\kappa$ B activation is essential for thymic Treg cell differentiation, and further suggest pharmacological NF- $\kappa$ B inhibition as a potential therapeutic approach for manipulating this process.

**Citation:** Gückel E, Frey S, Zaiss MM, Schett G, Ghosh S, et al. (2011) Cell-Intrinsic NF- $\kappa$ B Activation Is Critical for the Development of Natural Regulatory T Cells in Mice. PLoS ONE 6(5): e20003. doi:10.1371/journal.pone.0020003

**Editor:** Christoph Kleinschmitt, Julius-Maximilians-Universität Würzburg, Germany

**Received:** January 25, 2011; **Accepted:** April 8, 2011; **Published:** May 18, 2011

**Copyright:** © 2011 Gückel et al. This is an open-access article distributed under the terms of the Creative Commons Attribution License, which permits unrestricted use, distribution, and reproduction in any medium, provided the original author and source are credited.

**Funding:** This work was supported by the German Research Society (Collaborative Research Centers SFB 643; project B3) and the Interdisciplinary Center for Clinical Research (IZKF; project number N2). Parts of this work were also funded by an intramural grant from the ELAN fund and the Training Grant GK592, from the German Research Community (DFG). The funders had no role in study design, data collection and analysis, decision to publish, or preparation of the manuscript.

**Competing Interests:** The authors have declared that no competing interests exist.

\* E-mail: reinhard.voll@uniklinik-freiburg.de

## Introduction

Regulatory T (Treg) cells comprise a functionally distinct T cell lineage that plays a crucial role in maintaining peripheral tolerance and preventing autoimmunity by suppressing proliferation, cytokine secretion and activation of conventional T cells [1,2,3,4,5,6,7,8]. Treg cells can be divided into two major subgroups: naturally occurring Treg cells (nTreg) that develop within the thymus [9], and induced Treg cells (iTreg) that are generated by conversion from conventional T cells (Tconv) in the periphery by a variety of different stimuli [10,11,12,13].

The best-characterized subtype, however, are the thymic-derived naturally occurring Treg cells that comprise about 5–10% of peripheral CD4<sup>+</sup> T cells in healthy humans and mice. Treg cells constitutively express the IL-2 receptor  $\alpha$  chain (CD25) [1] as well as the transcription factor Foxp3 [14,15,16]. Rather

than governing Treg cell lineage commitment [15,16], Foxp3 acts more like a Treg cell stabilizing factor maintaining Treg cell-specific gene expression that was initially induced by other transcription factors [17,18,19]. Nevertheless, Foxp3 expression is essential for the suppressive function of Treg cells, because loss-of-function *foxp3* mutations result in strong hyper-lymphoproliferative disease and multi-organ autoimmunity in humans (IPEX syndrome, immune dysregulation, polyendocrinopathy, enteropathy, X-linked) [20,21] and mice (scurfy mice) [22,23].

So far the signaling pathways involved in the generation of naturally occurring Treg cells remain to be completely elucidated. It is generally believed that Treg cells develop within the thymus through interaction of high-affinity TCRs with cognate self-antigens presented by thymic epithelial cells [24,25,26]. However, signaling through the TCR alone is not sufficient. Several additional signals, including CD28 costimulation [27,28,29] as

well as common- $\gamma$  chain cytokines ( $\gamma$ c), especially IL-2 [30,31,32,33,34], are also necessary. Additionally, STAT5 (signal transducer and activator of transcription 5) activation as a result of proximal  $\gamma$ c-receptor signaling appears to be required for thymic Treg cell generation [35,36,37]. Based on these observations and additional data, a two-step model for the thymic development of regulatory T cells has been suggested: in the first step, developing thymocytes following a strong TCR/CD28 signal upregulate CD25 and other components of the IL-2 signaling pathway. This enables these CD4<sup>+</sup>CD25<sup>hi</sup>Foxp3<sup>-</sup> Treg precursor cells in a second TCR-independent step to respond to IL-2 resulting in STAT5 activation, thereby inducing Foxp3 expression and completing Treg cell development [38,39].

The activation of the NF- $\kappa$ B pathway as a downstream signaling event following TCR/CD28 ligation has been implicated in thymic Treg cell development [40]. The mammalian NF- $\kappa$ B transcription factor family consists of five members (p50/p105, p65/RelA, c-Rel, p52/p100, RelB) which can form both homo- and heterodimers. In resting cells, NF- $\kappa$ B dimers are kept inactive in the cytoplasm through the association with inhibitory I $\kappa$ B proteins such as I $\kappa$ B $\alpha$ , I $\kappa$ B $\beta$  and I $\kappa$ B $\epsilon$  as well as p105 and p100 as precursor forms of NF- $\kappa$ B1 (p50) and NF- $\kappa$ B2 (p52), respectively. Upon cell activation the IKK-complex, consisting of the two catalytic subunits IKK $\alpha$  and IKK $\beta$ , and the regulatory subunit IKK $\gamma$  (NEMO), gets activated, subsequently phosphorylates I $\kappa$ B followed by its proteasomal degradation, thereby allowing the NF- $\kappa$ B dimers to translocate into the nucleus. There are two known pathways of NF- $\kappa$ B activation: the “classical” pathway, mediated by IKK $\beta$  activating p50, p65 and c-Rel, in contrast to the “non-canonical” one which involves IKK $\alpha$  recruiting p52 and RelB [41,42].

In conventional T cells, “classical” NF- $\kappa$ B activation following TCR/CD28 ligation is mediated by PKC $\theta$  stimulating CARMA1, Bcl10, and MALT to form the so called CBM-complex. This complex phosphorylates and thereby activates IKK $\beta$ , which in turn phosphorylates I $\kappa$ B, an event resulting in its proteasomal degradation and subsequent activation of NF- $\kappa$ B [43,44,45,46,47]. Mice deficient in either PCK $\theta$ , Bcl10, or CARMA1 [48,49,50,51], as well as mice lacking IKK $\beta$  or NF- $\kappa$ B/Rel proteins such as p50 and c-Rel [52,53,54,55,56] show impaired Treg cell development leaving other T cell subpopulations unchanged. Recently, Long *et al.* showed that modulation of NF- $\kappa$ B activation influenced Foxp3 expression. Activation of NF- $\kappa$ B through transgenic expression of a constitutively active IKK $\beta$  (IKKEE Tg) increased the number of thymic Foxp3<sup>+</sup> Treg cells, whereas inhibition of NF- $\kappa$ B resulting from transgenic expression of a stabilized I $\kappa$ B $\alpha$  (I $\kappa$ B $\alpha$ -SR Tg) decreased the thymic Treg cell number [57].

However, it remains unclear whether Treg cell-intrinsic NF- $\kappa$ B activation is essential for the development of early Treg precursor cells and/or for the survival of fully differentiated Treg cells. Additionally, it cannot be excluded that insufficient IL-2 supply may account for the reduced Treg cell numbers in mice with attenuated NF- $\kappa$ B activity. Using I $\kappa$ B $\alpha$ -“SuperRepressor” transgenic mice (I $\kappa$ B $\alpha$ -SR Tg) we provide evidence that “classical” NF- $\kappa$ B activation is critical for the generation of cytokine-responsive thymic Treg precursor cells. Furthermore, IL-2 supplementation as well as adoptive transfer experiments demonstrated that the failure in Treg cell differentiation is predominantly due to a cell-intrinsic defect. Finally, systemic pharmacological IKK $\beta$  inhibition led to significantly decreased CD4<sup>+</sup>CD25<sup>+</sup>Foxp3<sup>+</sup> Treg frequencies in thymus and spleen, suggesting NF- $\kappa$ B inhibition as a potential therapeutic approach to manipulate Treg cell differentiation.

## Results

### Reduced thymic and peripheral Treg cell numbers in I $\kappa$ B $\alpha$ -SR Tg mice

To investigate the role of classical NF- $\kappa$ B activation for the development of naturally occurring Treg cells, we used a transgenic mouse model expressing a mutated and thereby stabilized form of I $\kappa$ B $\alpha$  (I $\kappa$ B $\alpha$ -“SuperRepressor”) under control of the proximal lck-promoter (I $\kappa$ B $\alpha$ -SR Tg) to achieve high levels of thymocyte-specific expression as shown by western blot analyses (Figure S1A and [58] Material and Methods S1). The transgene expression could also be detected in peripheral lymphocytes in the spleen, but to a lesser extent (Figure S1A). Nuclear extracts of thymocytes from I $\kappa$ B $\alpha$ -SR Tg mice showed a markedly attenuated NF- $\kappa$ B nuclear DNA binding activity by electromobility shift assay (EMSA, Materials and Methods S1) when cells were directly analyzed *ex vivo*, and even more pronounced, after 1 hour of mitogen stimulation *in vitro* (Figure S1B). Consistent with these data, ELISA analyses (Material and Methods S1) revealed that nuclear extracts from I $\kappa$ B $\alpha$ -SR Tg mice contained significantly less activated p65/RelA and c-Rel after mitogen stimulation. Activated p50 was reduced by about 30% in I $\kappa$ B $\alpha$ -SR Tg mice compared to wild-type controls (Figure S1C).

Consistent with the previous description of the I $\kappa$ B $\alpha$ -SR Tg mice [58], the thymus from double-transgenic mice was of normal size and the absolute thymocyte numbers were not significantly different compared to wild-type mice. Flow cytometric analyses further revealed normal frequencies of CD4<sup>+</sup>CD8<sup>+</sup> double-positive (DP), as well as CD4<sup>+</sup> single-positive (SP) thymocytes. As previously reported, there was a strong decrease in the numbers of CD8SP thymocytes. In the spleens of I $\kappa$ B $\alpha$ -SR Tg mice peripheral CD8<sup>+</sup> T lymphocyte numbers were even more severely reduced (Figure 1A, C upper panel). Consistently, we observed a prominent loss of peripheral CD4<sup>+</sup> and even more pronounced CD8<sup>+</sup> T lymphocytes in I $\kappa$ B $\alpha$ -SR Tg mice (Figure 1C, upper panel). Of note, the frequency of CD25<sup>+</sup>Foxp3<sup>-</sup>CD4SP thymocytes, a subpopulation which is enriched in cytokine-dependent Treg precursor cells [38,39,59], was markedly reduced in I $\kappa$ B $\alpha$ -SR Tg mice (Figure 1A, lower panel). The frequencies, as well as absolute cell numbers of mature thymic CD25<sup>+</sup>Foxp3<sup>+</sup>CD4SP Treg cells were also significantly diminished compared to wild-type controls (Figure 1A, lower panel, B). In the I $\kappa$ B $\alpha$ -SR Tg mice peripheral splenic CD25<sup>+</sup>Foxp3<sup>+</sup>CD4<sup>+</sup> Treg cells were only slightly reduced in their frequency in respect to all CD4<sup>+</sup> cells, but were dramatically decreased in terms of their absolute cell number (Figure 1C, D). These results show that normal NF- $\kappa$ B activity is required for the development and homeostasis of Treg cells. The profound decrease in the total Treg cell numbers in the spleen might be enhanced due to the strong reduction of all mature CD4<sup>+</sup> T lymphocytes in the periphery of I $\kappa$ B $\alpha$ -SR Tg mice and their impaired IL-2 production (Figure 1C, upper panel).

### Supplementation of I $\kappa$ B $\alpha$ -SR Tg mice with IL-2 does not rescue thymic Treg cells

Common- $\gamma$  chain cytokines, especially IL-2, are important for the development and homeostasis of Treg cells. Treg cells themselves are unable to produce IL-2 and are dependent on paracrine IL-2, which is predominantly produced by activated T helper cells [3]. Hence, CD4<sup>+</sup>CD25<sup>+</sup> Tregs are diminished in IL-2R $\beta$ <sup>-/-</sup> mice [30]. Additionally, Treg frequencies as well as numbers are reduced by about 50% in IL-2<sup>-/-</sup> and CD25<sup>-/-</sup> mice [32,60]. It has been shown that NF- $\kappa$ B activation is important for IL-2 expression [61,62] and that mice lacking different components of the NF- $\kappa$ B signaling pathway, such as

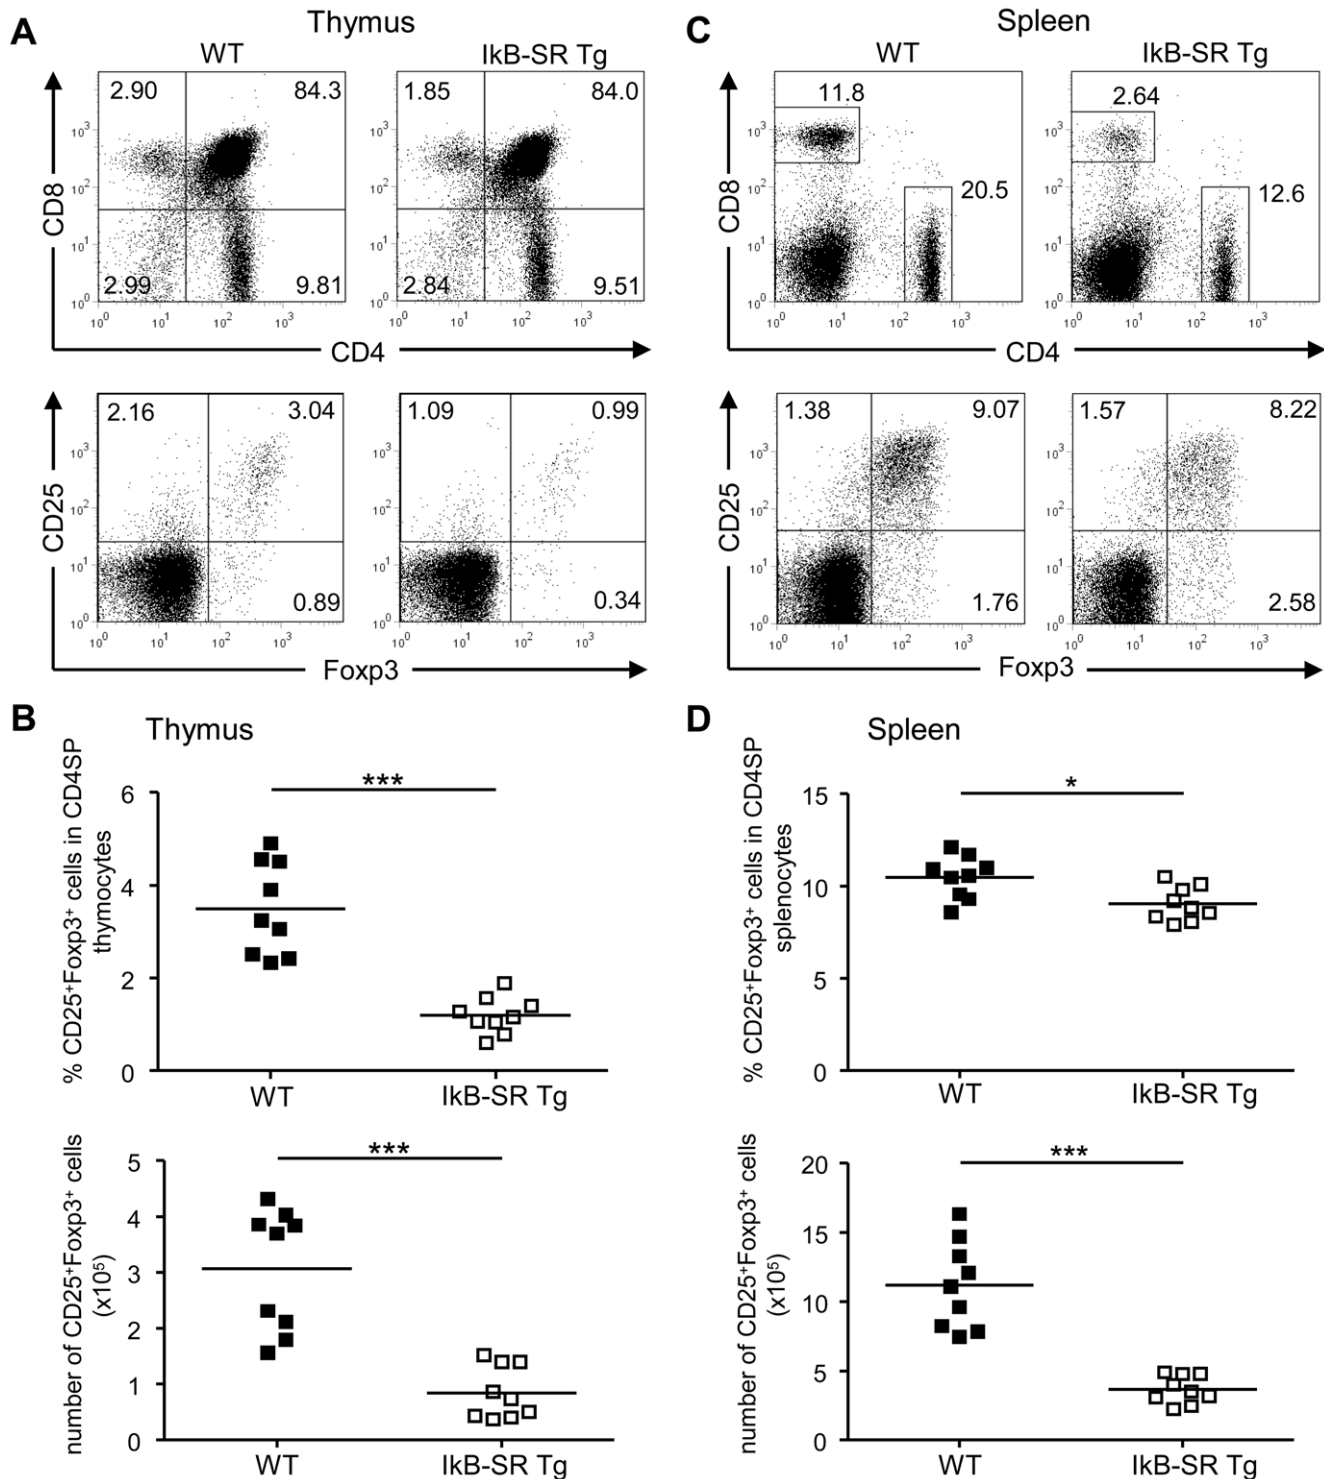

**Figure 1. Treg cell numbers are reduced in IκB $\alpha$ -SR Tg mice.** Single-cell suspensions from thymus and spleen of wild-type (WT) and IκB $\alpha$ -“SuperRepressor” transgenic (IκB-SR Tg) mice were stained with CD4, CD8, CD25, and Foxp3 antibodies and analyzed by flow cytometry. (A, C) Representative dot plots from one of three independent experiments are shown. Expression profiles of CD4 versus CD8 (upper panels) and CD25 versus intracellular Foxp3 (gated on CD4 SP cells, lower panels) of thymocytes (A) and splenocytes (C) of WT and IκB-SR Tg mice. Numbers in the quadrants indicate the percentages of cells. (B, D) Percentages of CD25<sup>+</sup>Foxp3<sup>+</sup> Treg cells relative to CD4SP cells, as well as absolute numbers of Treg cells in the thymus (B) and spleen (D) of individual WT and IκB-SR Tg mice are displayed. Each symbol represents an individual mouse. Data were compiled from three independent experiments. In each experiment, organs from three mice per genotype were analyzed separately. Horizontal bars represent the mean. Mann-Whitney *U*-test was used for statistical analyses. \*,  $p \leq 0.05$ ; \*\*\*,  $p \leq 0.001$ ; ns, not significant. doi:10.1371/journal.pone.0020003.g001

Bcl10<sup>-/-</sup>, PCK0<sup>-/-</sup>, MALT1<sup>-/-</sup>, and CARMA1<sup>-/-</sup> mice, secrete less IL-2 upon stimulation [43,46,47,51]. As expected, lymphocytes from thymus and spleen of I $\kappa$ B $\alpha$ -SR Tg mice secreted significantly less IL-2 upon mitogen stimulation as determined by ELISA (**Figure 2A**, Figure S2A). Therefore, we investigated if the reduced numbers of Treg cells in I $\kappa$ B $\alpha$ -SR Tg mice are due to an insufficient supply of IL-2 from conventional T cells. Wild-type as well as I $\kappa$ B $\alpha$ -SR Tg mice were injected with IL-2 for two days to analyze the effect on Treg cell development. This rather short treatment period was initially chosen to minimize any unwanted “side-effects” due to non-physiologically high IL-2 levels which might then skew the effect of the IL-2 supplementation on Treg cell development. Flow cytometric analyses revealed that percentages and numbers of CD25<sup>+</sup>Foxp3<sup>+</sup>CD4SP cytokine-responsive thymic Treg precursor cells remained unaltered after administration of exogenous IL-2 (**Figure 2B, C**). In contrast, IL-2 significantly increased the frequencies as well as total cell numbers of mature CD25<sup>+</sup>Foxp3<sup>+</sup>CD4SP thymic Treg cells in I $\kappa$ B $\alpha$ -SR Tg mice, whereas thymic Treg cells from wild-type control mice were only slightly affected (**Figure 2B, D**). Exogenous IL-2 considerably increased the frequencies and the absolute cell numbers of splenic CD25<sup>+</sup>Foxp3<sup>+</sup>CD4<sup>+</sup> Treg cells both in wild-type and I $\kappa$ B $\alpha$ -SR Tg mice. In I $\kappa$ B $\alpha$ -SR Tg mice the frequency of Treg cells almost reached wild-type levels (Figure S2B, C).

In a second experiment we extended the treatment period to seven days, since injection of IL-2 for only two days may be too short to fully reverse the observed developmental defect in the thymus in I $\kappa$ B $\alpha$ -SR Tg mice. Flow cytometric analyses confirmed unaltered frequencies and absolute numbers of CD25<sup>+</sup>Foxp3<sup>+</sup>CD4SP cytokine-responsive thymic Treg precursor cells as well as significantly elevated percentages and total numbers of Treg cells in the thymus of I $\kappa$ B $\alpha$ -SR Tg mice (Figure S3A, B). Similar to the results obtained after two days of treatment, thymic Treg cell numbers did not reach wild-type levels (Figure S3A, B). The defect in the periphery of I $\kappa$ B $\alpha$ -SR Tg mice was also not completely reversed following this prolonged IL-2 treatment although splenic Treg cells were further increased regarding frequencies and total cell numbers in wild-type and I $\kappa$ B $\alpha$ -SR Tg mice when compared to the shorter treatment period (Figure S3C).

Several studies have shown that signaling through the high affinity IL-2 receptor (IL-2R) is important for Treg cell development and homeostasis. Mice deficient in components of proximal IL-2R signaling display remarkably reduced numbers of Treg cells in the thymus and the periphery, as it was published for T cell-specific STAT5ab-deficient mice [35,36]. Moreover, transgenic mice expressing a constitutively active STAT5b show a profound increase in Treg cell numbers, and transgene expression can even restore Treg cell numbers in the absence of IL-2 [35,39]. Therefore, we wanted to investigate if the impaired Treg cell development in I $\kappa$ B $\alpha$ -SR Tg mice could be due to restrained IL-2 signal transduction, in addition to IL-2 deprivation and subsequent proliferative defects. Total thymocytes from wild-type and I $\kappa$ B $\alpha$ -SR Tg mice were isolated and *in vitro* stimulated with IL-2. Total cell lysates were prepared and STAT5 phosphorylation was detected using western blot analyses (Material and Methods S1). The tyrosine phosphorylation status of STAT5 in thymocytes from I $\kappa$ B $\alpha$ -SR Tg mice was comparable to that of wild-type thymocytes (Figure S4). The expression level of total STAT5 was also not altered (Figure S4).

In summary, conventional T cells from I $\kappa$ B $\alpha$ -SR Tg mice secreted less IL-2 upon stimulation. However, the supplementation with exogenous IL-2 could only partially rescue thymic Treg cell numbers, although thymocytes from I $\kappa$ B $\alpha$ -SR Tg mice displayed

an intact IL-2R signaling. More importantly, IL-2 did not significantly increase the numbers of Treg precursor cells, suggesting that the Treg cell developmental defect can not be exclusively referred to a proliferation defect caused by decreased availability of IL-2.

### The defect in Treg cell development in I $\kappa$ B $\alpha$ -SR Tg mice is Treg cell-intrinsic

It has been shown previously that mice deficient in components of the NF- $\kappa$ B signaling pathway, such as PCK0<sup>-/-</sup>, Bcl10<sup>-/-</sup>, and CARMA1<sup>-/-</sup> mice [48,49,50,51], or deficient in NF- $\kappa$ B/Rel proteins like p50<sup>-/-</sup>c-Rel<sup>-/-</sup> double-deficient, c-Rel<sup>-/-</sup>, IKK $\beta$ <sup>-/-</sup>, and NF- $\kappa$ B1<sup>SSAA/SSAA</sup> mice [52,53,54,55,56] display impaired Treg cell development. Due to inhibition of NF- $\kappa$ B activation, deficiencies in any of these molecules primarily resulted in reduced IL-2 production by conventional T cells. In addition, NF- $\kappa$ B activation is also involved in the differentiation of various other hematopoietic cells that may contribute to normal Treg cell development [40]. Because we were not able to fully restore Treg cell numbers in I $\kappa$ B $\alpha$ -SR Tg mice by adding exogenous IL-2, we generated mixed bone marrow chimeras to investigate whether Treg cell-intrinsic rather than extrinsic defects are responsible for the Treg cell phenotype in I $\kappa$ B $\alpha$ -SR Tg mice. In these chimeric mice, wild-type derived cells can provide all potentially necessary extrinsic factors such as cytokines and surface receptor ligands for cell-cell interactions. Bone marrow cells from CD45.2<sup>+</sup> I $\kappa$ B $\alpha$ -SR Tg mice were mixed with equal cell numbers from CD45.1<sup>+</sup> wild-type mice and intravenously injected into lethally irradiated Rag1<sup>-/-</sup> mice. Mice engrafted with only CD45.1<sup>+</sup> wild-type bone marrow cells served as controls. Ten to twelve weeks after reconstitution the mice were analyzed by flow cytometry. We observed comparable percentages of lymphocyte subpopulations in wild-type chimeras and mixed bone marrow chimeras (Figure S5A), indicating normal lymphopoiesis in mixed bone marrow chimeras. Furthermore, both I $\kappa$ B $\alpha$ -SR Tg and wild-type bone marrow equally reconstituted DP and CD4SP thymocytes (Figure S5B), as well as B220<sup>+</sup>IgM<sup>+</sup> B cells in spleen and peripheral blood (Figure S5C, D) depicted by the 1:1 ratio of contributing cells to the given populations. In contrast, we observed that I $\kappa$ B $\alpha$ -SR Tg-derived bone marrow cells contributed significantly less to thymic CD8SP, peripheral CD4<sup>+</sup> and CD8<sup>+</sup> T cell populations in the spleen and peripheral blood, both in respect to frequencies as well as absolute cell numbers (Figure S5C, D). Importantly, bone marrow from I $\kappa$ B $\alpha$ -SR Tg mice yielded markedly fewer Foxp3<sup>+</sup>CD4SP thymic Treg cells in the mixed bone marrow chimeras, with respect to frequency and absolute cell number (**Figure 3A, B, C**). Interestingly, the frequency of CD25<sup>+</sup>Foxp3<sup>+</sup> peripheral Treg cells within the I $\kappa$ B $\alpha$ -SR Tg bone marrow-derived CD4SP T cell compartment was similar to the one in the wild-type derived CD4SP T cell compartment, both in the spleen and peripheral blood (**Figure 3A**). Consistent with the profound reduction in the total cell number of I $\kappa$ B $\alpha$ -SR Tg-derived CD4<sup>+</sup> peripheral T cells (Figure S5C), the percentage of I $\kappa$ B $\alpha$ -SR Tg bone marrow cells contributing to the total Treg cell pool in the periphery was below 20% (**Figure 3B**). Concomitantly, the total number of I $\kappa$ B $\alpha$ -SR-derived peripheral Treg cells in the spleen were also significantly reduced compared to wild-type derived ones (**Figure 3C**).

Collectively, these data show that the impaired thymic generation of Treg cells in I $\kappa$ B $\alpha$ -SR Tg mice is rather due to a Treg cell-intrinsic defect than an extrinsic one, because it cannot be compensated despite the presence of wild-type derived T lymphocytes and soluble factors.

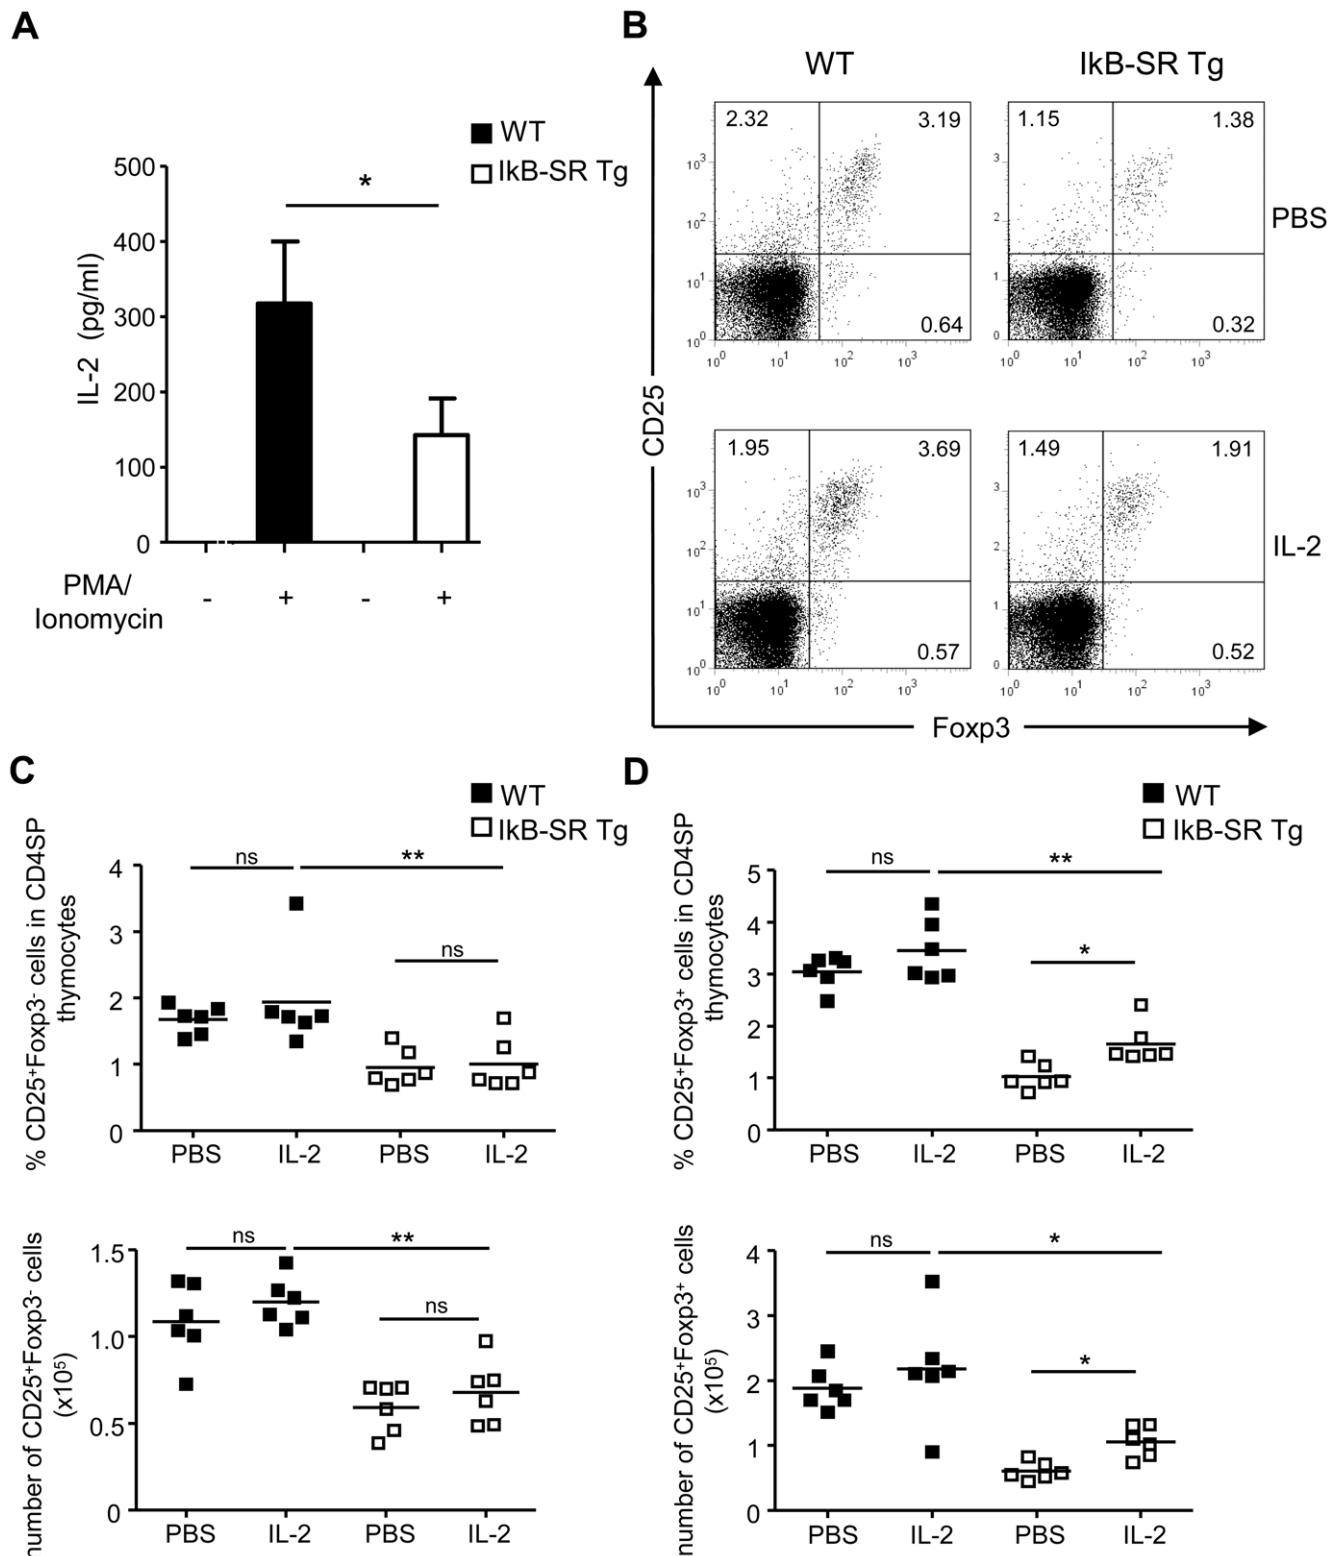

**Figure 2. IL-2 can only partially rescue Treg cell numbers in the thymus of IkB $\alpha$ -SR Tg mice.** (A) Thymocytes from wild-type (WT) and IkB $\alpha$ -“SuperRepressor” transgenic (IkB-SR Tg) mice were either left untreated (–) or stimulated (+) with PMA and ionomycin for 24 h. The IL-2 concentrations in the supernatants were determined by ELISA. IL-2 secretion from unstimulated cells was below the detection limit. Mean values and SD were calculated from triplicates. Student’s *t* test was used for statistical analyses. \*, *p* < 0.05. (B, C, D) Wild-type and IkB-SR Tg mice were injected either with IL-2 or PBS every 8 h for 2 days and thymi were analyzed by flow cytometry. (B) Representative dot plots from one of three independent experiments are shown. Numbers in the quadrants represent the percentages of cells among CD4SP thymocytes from untreated (PBS) and IL-2 treated mice. (C) Percentages of CD25<sup>+</sup>Foxp3<sup>+</sup> cytokine-responsive Treg precursor cells among CD4SP thymocytes, as well as their absolute numbers in the thymus. (D) Percentages of CD25<sup>+</sup>Foxp3<sup>+</sup> mature Treg cells among CD4SP thymocytes, as well as their absolute numbers. (B, C, D) Data were

compiled from two independent experiments with three mice per genotype and treatment in each experiment. Each symbol represents an individual mouse. Horizontal bars represent the mean. Mann-Whitney *U*-test was used for statistical analyses. \*,  $p \leq 0.05$ ; ns, not significant.  
doi:10.1371/journal.pone.0020003.g002

### Pharmacological NF- $\kappa$ B inhibition impairs Treg cell development and homeostasis

IKK $\beta$ -mediated NF- $\kappa$ B activation is crucial for the development of Treg cells. On the one hand side, mice with a T cell-specific ablation of IKK $\beta$  show drastically reduced thymic as well as peripheral CD4<sup>+</sup>CD25<sup>+</sup> Treg cells [55]; on the other hand side, transgenic mice expressing a constitutively active IKK $\beta$  in T cells, display increased proportions and numbers of Foxp3<sup>+</sup> cells in the thymus [57]. Therefore, we investigated whether pharmacological IKK $\beta$ -inhibition impacts on Treg cell development and homeostasis. AS602868, an anilino-pyrimidine derivative and ATP competitor, reversibly inhibits IKK $\beta$  [63]. Wild-type mice either received AS602868 or vehicle twice a day by oral gavage. Nuclear extracts from AS602868 treated animals revealed an attenuation of thymic and splenic nuclear NF- $\kappa$ B DNA binding activity by approximately 35% and 45%, respectively, as determined by

ELISA (Figure S6A). There were no significant alterations in absolute cell numbers of lymphocyte subpopulations in thymus and spleen (Figure S6B, D). Furthermore, T cell development appeared unaffected by AS602868 as supported by normal cell distributions of thymocyte subpopulations. The percentages and total numbers of CD4<sup>+</sup>CD8<sup>+</sup> double-negative (DN), DP, CD4SP and CD8SP cells closely resembled those of vehicle treated animals (Figure S6C). AS602868 treatment did also not markedly alter the proportions and total numbers of peripheral CD4<sup>+</sup> and CD8<sup>+</sup> T cells in the spleen, except for a trend towards decreased total cell numbers of both cell types (Figure S6E). However, application of the IKK $\beta$  inhibitor AS602868 for 7 days resulted in a significantly decreased frequency of the thymic CD25<sup>+</sup>Foxp3<sup>+</sup>CD4SP Treg cell compartment (Figure 4A). Moreover, IKK $\beta$ -inhibition led to slightly, but significantly reduced percentages of Treg cells in the spleen (Figure 4B).

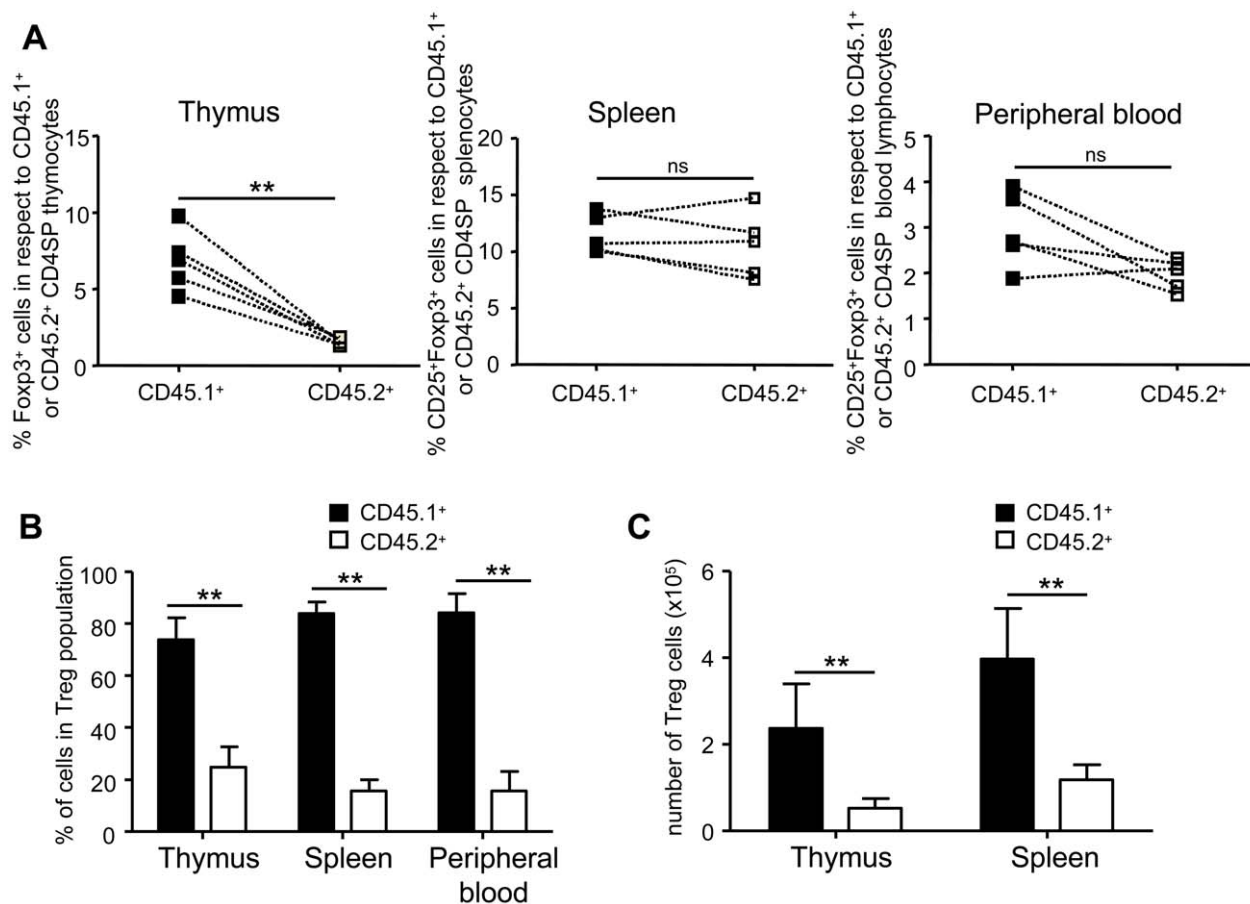

**Figure 3. Treg cell development is intrinsically impaired in thymocytes overexpressing an IkB $\alpha$ -“SuperRepressor”.** Mixed bone marrow chimeras were generated by either injecting equal numbers of CD45.1<sup>+</sup>C57BL/6 wild-type and CD45.2<sup>+</sup>IkB-SR Tg bone marrow cells (mixed chimera,  $n = 5$ ) or just CD45.1<sup>+</sup>C57BL/6 wild-type bone marrow cells (WT chimera,  $n = 3$ ) into lethally irradiated Rag1<sup>-/-</sup> recipient mice. Ten weeks later, Treg populations were examined in thymus, spleen and peripheral blood by flow cytometry. (A) Percentages of Treg cells in respect to CD45.1<sup>+</sup> or CD45.2<sup>+</sup> CD4SP cells as indicated in organs of mixed chimeras. Connected symbols indicate values from the same mouse. (B, C). Contributions of wild-type (CD45.1<sup>+</sup>) and IkB-SR Tg derived (CD45.2<sup>+</sup>) cells to the total Treg cell populations in thymus, spleen, and peripheral blood of mixed chimeras. Depicted are the mean values of percentages (B) as well as absolute cell numbers + SD (C) of contributing cells in the Treg population. Data are representative of two independent experiments with similar numbers of mice in each experimental group. Mann-Whitney *U*-test was used for statistical analyses. \*\*,  $p \leq 0.01$ ; ns, not significant.  
doi:10.1371/journal.pone.0020003.g003

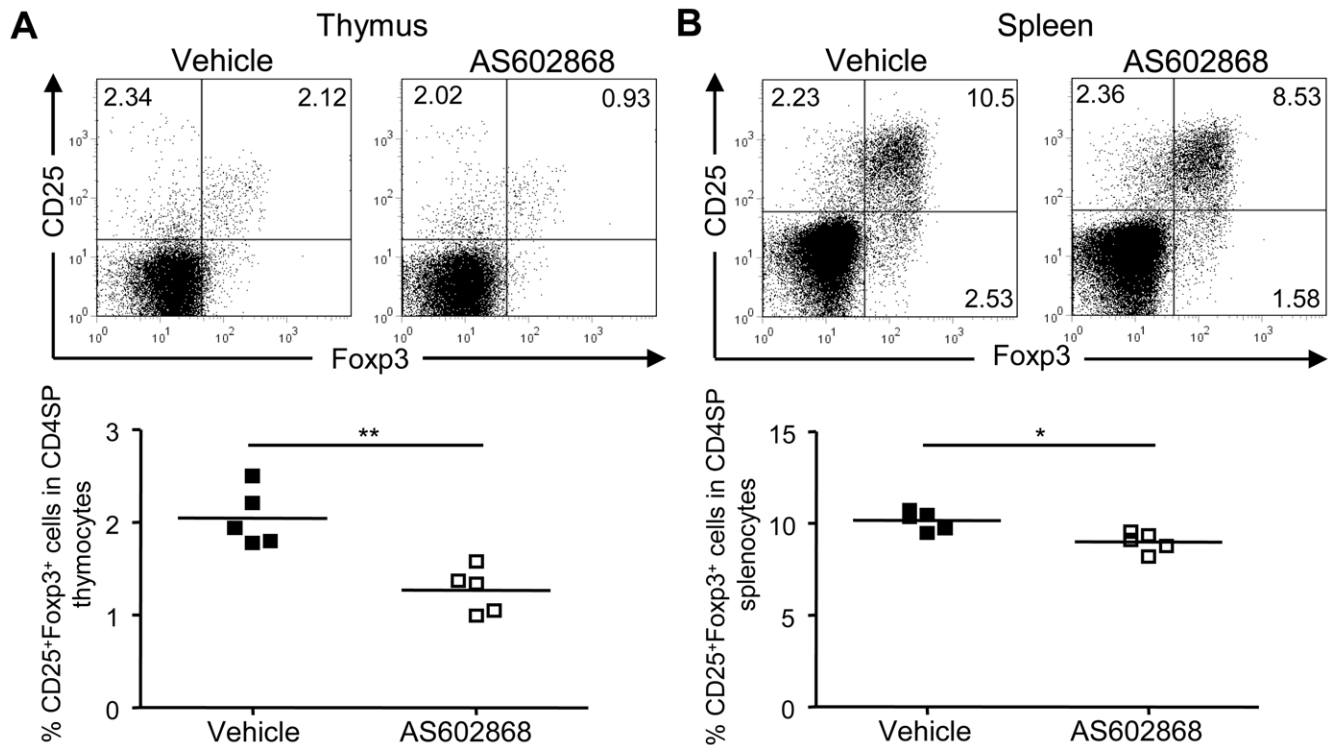

**Figure 4. Pharmacological NF- $\kappa$ B inhibition impairs thymic Treg cell development.** Wild-type mice either received the IKK $\beta$ -inhibitor AS602868 (30 mg/kg) or vehicle twice a day for 7 days and thymus and spleen were analyzed by flow cytometry. Representative dot plots from one of three independent experiments are shown (upper panel). Numbers in the quadrants represent the percentages of CD25<sup>+</sup>Foxp3<sup>+</sup> cells among CD4SP cells in thymus (A) and spleen (B) from untreated (Vehicle) and treated mice (AS602868). Percentages of CD25<sup>+</sup>Foxp3<sup>+</sup> Treg cells among CD4SP cells of individual mice are displayed (lower panel). Data are representative of three independent experiments with equal numbers of mice in each experimental group. Each symbol represents an individual mouse. Horizontal bars represent the mean. Mann-Whitney *U*-test was used for statistical analyses. \*,  $p \leq 0.05$ ; \*\*,  $p \leq 0.01$ ; ns, not significant. doi:10.1371/journal.pone.0020003.g004

These results implicate that pharmacological IKK $\beta$ -inhibition leads to impairments in the development of Treg cells even after short periods of application, while leaving other T cell subpopulations unaffected.

## Discussion

The NF- $\kappa$ B signaling pathway was suspected to be crucially involved in the development of naturally occurring Treg cells, because mice lacking molecules of proximal TCR signaling leading to NF- $\kappa$ B activation, such as PCK $\theta$ , Bcl10, or CARMA1, show marked defects in the thymic generation of Treg cells [48,49,50,51]. Furthermore, mice with genetic ablations of IKK $\beta$  or NF- $\kappa$ B proteins like p50<sup>-/-</sup>c-Rel<sup>-/-</sup> double-deficient or c-Rel<sup>-/-</sup> mice display profoundly reduced numbers of CD4<sup>+</sup>Foxp3<sup>+</sup> Treg cells in thymus and periphery, whereas conventional T cell populations remain largely unaltered [52,53,54,55,56]. Finally, in transgenic mice with either elevated or attenuated NF- $\kappa$ B activation, the numbers of CD4<sup>+</sup>Foxp3<sup>+</sup> Treg cells are increased or decreased, respectively [57]. In this study we investigated whether this developmental defect is Treg cell-intrinsic or due to extrinsic effects such as insufficient IL-2 secretion by conventional T cells. Our data demonstrate that the impaired thymic Treg cell development in IkB $\alpha$ -SR Tg mice results mainly from a Treg cell-intrinsic defect.

We confirmed a reduced frequency and number of CD4<sup>+</sup>CD25<sup>+</sup>Foxp3<sup>+</sup> Treg cells due to diminished NF- $\kappa$ B activation in thymus and spleen of IkB $\alpha$ -SR Tg mice. Our

observations are in line with a previous study by Long *et al.*, although they found a normal peripheral Treg cell frequency in IkB $\alpha$ -SR Tg mice resulting in just a trend towards decreased Treg cell numbers in the spleen [57]. This observation could be due to age differences of the mice, as Treg cell numbers significantly increase with age [64,65]. Moderately reduced thymic but unaltered peripheral frequencies of Treg cells have also been described for IkB $\alpha$  $\Delta$ NTg mice [62] expressing a truncated form of IkB $\alpha$ , which is refractory to signal-induced degradation [59,66]. Total CD4<sup>+</sup> T cell and Treg cell numbers were markedly decreased in the spleens of IkB $\alpha$  $\Delta$ NTg mice [66]. Similarly, in IkB $\alpha$ -SR Tg mice we found markedly decreased splenic CD4<sup>+</sup> T cell numbers, in addition to the previously described strongly diminished CD8SP thymocytes and peripheral T cells [58]. In spite of the decreased absolute number, the frequency of peripheral Treg cells among all CD4<sup>+</sup> T cells was largely preserved due to the also decreased CD4<sup>+</sup> T cell count.

Naturally occurring Treg cells cannot produce IL-2 and are therefore dependent on paracrine IL-2, secreted from conventional T cells [3]. Mice deficient in IL-2 or CD25 show reduced numbers of Foxp3<sup>+</sup> Treg cells [32,67]. Additionally, IL-2R $\beta$ <sup>-/-</sup>, IL2<sup>-/-</sup>IL15<sup>-/-</sup> double-deficient as well as IL-2R $\gamma$ <sup>-/-</sup> mice are characterized by a drastic loss of thymic and peripheral Treg cells [30,33,60]. Administration of a neutralizing anti-IL-2 antibody to neonatal mice reduced Treg cell numbers substantially [68]. According to the previously published two-step model, thymic Treg cell development is governed by both TCR and IL-2 signaling, converging in STAT5 activation, which initiates Foxp3

gene expression [38,39]. Here we showed significantly decreased cytokine-responsive CD25<sup>+</sup>Foxp3<sup>+</sup>CD4SP thymic Treg precursor cells when NF- $\kappa$ B activation is attenuated within the T cell lineage. Our data are in line with the two-step model, as strong TCR signaling is necessary for precursor induction. TCR-induced NF- $\kappa$ B activation appears to be involved in that process. Still, it remained unclear whether NF- $\kappa$ B activation is only required for the generation of Treg precursor cells or also at later stages of thymic Treg cell development and proliferation. There was a reduction by approximately 50% in thymic Treg precursor cells compared to 70% in mature CD25<sup>+</sup>Foxp3<sup>+</sup>CD4SP thymic Treg cells in I $\kappa$ B $\alpha$ -SR Tg mice. Possibly, NF- $\kappa$ B-deficient precursor cells progress less efficiently to mature Tregs than their wild-type counterparts. Additionally, survival and proliferation of the mature Treg cells could be impaired. This might be due to a lack of IL-2, since NF- $\kappa$ B activation is mandatory for normal IL-2 production [43,46,47,51,55,61,62,69], or due to a defect in IL-2R signaling converging in STAT5 activation [33]. Our observations argue against IL-2 deprivation as the only reason for impaired thymic Treg cell differentiation in I $\kappa$ B $\alpha$ -SR Tg mice. Although IL-2 secretion was significantly diminished in I $\kappa$ B $\alpha$ -SR Tg mice, administration of IL-2 for two and seven days could only partially restore thymic Treg cell numbers and did not influence the decreased numbers of Treg precursor cells. This is in line with data from Molinero *et al.* also showing that exogenous IL-2 could not reverse the low numbers of thymic Treg cells in CARMA1<sup>-/-</sup> mice [51]. Moreover, restoring NF- $\kappa$ B activity through expression of a constitutively active IKK $\beta$  transgene could regenerate the complete lack of thymic Treg cells in TAK1<sup>-/-</sup> and CARMA1<sup>-/-</sup> mice without rescuing the development of conventional peripheral T cells as predominant IL-2 producers [57]. Notably, CYLD<sup>-/-</sup> mice failed to restore Treg cell numbers in CARMA1<sup>-/-</sup> mice, although exhibiting constitutive NF- $\kappa$ B activation [59]. The latter study argues for two different NF- $\kappa$ B signaling pathways being involved in these two mouse models.

We did not find any evidence for impaired IL-2R signaling in thymocytes from I $\kappa$ B $\alpha$ -SR Tg mice. Hence, it is unlikely that thymic Treg precursor cells are not able to respond properly to IL-2. Similarly, transgenic expression of I $\kappa$ B $\alpha$  $\Delta$ N was reported to have no impact on proximal IL-2R signaling in total thymocytes [59]. Reciprocally, transgenically enhanced NF- $\kappa$ B signaling did neither increase  $\gamma$ c-receptor expression nor responsiveness to  $\gamma$ c-cytokines [57]. In contrast, two other studies have provided evidence that impaired NF- $\kappa$ B signaling can result in attenuated proximal IL-2R signaling. I $\kappa$ B $\alpha$  $\Delta$ NTg mice exhibited a striking defect in thymic STAT5a activation [70], and NF- $\kappa$ B<sup>SSAA/SSAA</sup> knock-in mice, expressing a p105 mutant resistant to signal-induced degradation, also displayed a IL-2R signaling defect in peripheral T cells [56]. The reasons for these discrepancies remain to be elucidated.

Mixed bone marrow chimeras established a Treg cell-intrinsic requirement for NF- $\kappa$ B activation as the presence of both wild-type derived soluble factors and hematopoietic cells could not restore thymic Treg cell development of I $\kappa$ B $\alpha$ -SR Tg cells. The dramatic reduction of Treg cells in PKC $\theta$ <sup>-/-</sup>, Bcl-10<sup>-/-</sup>, and c-Rel<sup>-/-</sup> mice was also referred to a Treg cell-intrinsic defect [53,54,57,71]. Together, these data clearly argue against a predominantly indirect role of NF- $\kappa$ B activation in thymic Treg cell development. Instead, normal Treg-cell intrinsic NF- $\kappa$ B activation seems to be mandatory to facilitate the generation of thymic Treg precursor cells, possibly via enhancing/prolonging the necessary TCR signal, and to further support their susceptibility towards cytokine stimulation. Most importantly, the NF- $\kappa$ B pathway is directly involved in promoting Foxp3

expression, as c-Rel can bind to the CNS1 element (conserved noncoding sequence) within the promoter region, as well as to the CNS3 enhancer element, thereby initiating chromatin remodeling and leading to an open chromatin conformation at the *foxp3* locus [57]. In addition, Ruan *et al.* reported that c-Rel, via binding to the *foxp3* promoter, induces the formation of an “enhanceosome” through the recruitment of other transcription factors which subsequently engage histone-modifying enzymes and finally turn on Foxp3 expression [71]. Interestingly, as soon as Foxp3 is expressed in developing Treg, it may counteract the transcriptional activity of NF- $\kappa$ B by direct interaction [72].

The reduced thymic output of mature Treg cells may account partially for diminished peripheral Treg cell numbers in I $\kappa$ B $\alpha$ -SR Tg mice. However, recombinant IL-2 provoked a strong proliferative response in peripheral Treg cells of I $\kappa$ B $\alpha$ -SR Tg mice, resulting in an increase of Treg frequencies, comparable to those of wild-type mice. Moreover, in mixed bone marrow chimeras the frequencies of I $\kappa$ B $\alpha$ -SR-derived, peripheral Treg cells within the I $\kappa$ B $\alpha$ -SR-derived T cell compartment closely resembled those derived from wild-type bone marrow. These data may indicate that wild-type bone marrow-derived conventional T cells supplied sufficient IL-2 to promote expansion also of I $\kappa$ B $\alpha$ -SR Tg-derived Treg cells. The relatively low numbers of I $\kappa$ B $\alpha$ -SR-derived peripheral CD4<sup>+</sup> T cells may be rather due to impaired proliferation or survival, whereas peripheral I $\kappa$ B $\alpha$ -SR-derived Treg cells might be low due to decreased thymic output. Thus, in the periphery NF- $\kappa$ B activation seems to be more important for inducing IL-2 production by conventional T cells, instead of contributing cell-intrinsically to Treg cell homeostasis. Treg cell-intrinsic NF- $\kappa$ B activation was further reported to be dispensable for peripheral Treg cell conversion by TGF- $\beta$  [50,53,73], suggesting that different intracellular signaling pathways are involved in thymic and peripheral Treg cell generation. These reports are in contrast to observations that c-Rel<sup>-/-</sup> mice are indeed to some degree impaired in peripheral Treg cell conversion, possibly due to their defective IL-2 production as Treg cell conversion could be partially rescued by exogenous IL-2 [71,74].

Treg cells are important for controlling autoimmune diseases, allergy and graft rejection. They play a conflictive role in preventing anti-tumor responses as well as in clearing viral infections [75]. Manipulation of Treg cell differentiation is therefore in the centre of intensive research. Here we demonstrated that pharmacological IKK $\beta$ -inhibition via AS602868 markedly diminished Treg cell frequencies in thymus and also slightly, but significantly reduced Treg cell frequencies in spleens of mice, without detectable toxicity for conventional T cell subpopulations. Recent data proved also beneficial effects of AS602868 in treating various forms of cancer, as well as non-alcoholic steatohepatitis in animal models [76,77].

It was previously shown that prolonged high-dose pharmacological IKK $\beta$ -inhibition results in enhanced pro-IL-1 $\beta$  processing and elevated IL-1 $\beta$  concentrations [78], which in turn might favor the generation of pro-inflammatory Th17 cells [79,80]. Despite the inhibitory effects of IKK $\beta$ -blockade on Treg cell development and the potential promotion of Th17 cells, it appears unlikely that incomplete pharmacological IKK $\beta$ -inhibition fosters pro-inflammatory responses, the more so as many pro-inflammatory factors such as cytokines, chemokines and adhesion molecules are expressed in an NF- $\kappa$ B-dependent manner and are affected by IKK $\beta$ -inhibition. In fact, pharmacological IKK $\beta$ -inhibition was reported to induce beneficial effects in various animal models of inflammatory diseases like collagen-induced arthritis [81] and MOG<sub>33-55</sub>-induced experimental autoimmune encephalomyelitis

(EAE) [82], although the impact on the generation of Th17 cells was not investigated in those studies. Our findings implicate that at least short-term or transient systemic NF- $\kappa$ B inhibition resulting in reduced Treg cell generation might be a promising treatment strategy for diseases in which Treg cells negatively influence diseases' outcomes. Especially in cancer, IKK $\beta$  inhibitors may act in a dual way, first via directly impairing NF- $\kappa$ B-dependent survival mechanisms in the malignant cell itself, second via fostering the anti-cancer immune response by inhibition of Treg development.

In summary, we did not only show that Treg cell-intrinsic NF- $\kappa$ B activation is mandatory for thymic Treg cell development, but our observations also suggest that pharmacological IKK $\beta$ -inhibition might be beneficial for the treatment of diseases aggravated by Treg cells.

## Materials and Methods

### Ethics Statement

All animals were handled in strict accordance with good animal practice as defined by the relevant national and/or local animal welfare bodies, and all animal work was approved by the government of Mittelfranken (Regierung von Mittelfranken approval no. 54-2532.1-13/08 and TS-04/4 Med. III-IZKF N2).

### Mice

Transgenic mice expressing a stabilized form of I $\kappa$ B $\alpha$  (I $\kappa$ B $\alpha$ -SR Tg) have been described earlier [58]. C57BL/6 RAG1-deficient mice (Rag1<sup>-/-</sup>) and CD45.1 congenic C57BL/6 mice were kindly provided by Dr. Thomas Winkler (Department of Genetics, University of Erlangen-Nuremberg, Germany). C57BL/6J and BALB/cJ mice were purchased from Janvier S.A.S., Le Genest-St-Isle, France. Mice used for analysis were 4–6 weeks old, unless otherwise noted. All animals were housed under pathogen-free conditions in the animal facility of the University of Erlangen-Nürnberg.

### Flow cytometric analyses

Single-cell suspensions were obtained from bone marrow, thymi and spleens of mice via gentle homogenization of organs through nylon mesh filters (BD Pharmingen, San Jose, CA). For surface staining typically  $1 \times 10^6$  lymphocytes were incubated at 4°C for 30 min with fluorochrome-conjugated monoclonal antibodies against CD4, CD8, CD25, CD45.1, CD45.2, Streptavidin-PerCP, Streptavidin-PE (BD Pharmingen, San Jose, CA, USA) in PBS containing 2% FBS (Gibco, Invitrogen Life technologies, Karlsruhe, Germany). Intracellular FOXP3 staining was performed with a FOXP3 antibody together with the “FOXP3 Staining Buffer Set” (Miltenyi Biotec, Bergisch Gladbach, Germany) according to the manufacturer's instructions. Labeled cells were analyzed on a FACSCalibur flow cytometer (BD Pharmingen, San Jose, CA). Data were analyzed using the FlowJo Software (Tree Star Inc., Ashland, OR, USA).

### Cytokine Quantification by ELISA

Thymocytes and splenocytes from I $\kappa$ B $\alpha$ -SR Tg and C57BL/6 wild-type mice ( $2 \times 10^5$ /well) were cultured in triplicates in 96-well U-bottom plates in 200  $\mu$ l of complete RPMI (RPMI 1640 containing 10% FBS, 2 mM L-glutamine, 1 mM sodium-pyruvate, 50  $\mu$ M  $\beta$ -mercaptoethanol, 100 U/ml penicillin, 100  $\mu$ g/ml streptomycin, Gibco, Invitrogen Life technologies, Karlsruhe, Germany). The cells were either left untreated or stimulated with PMA (50 ng/ $\mu$ l) and ionomycin (1  $\mu$ M) (Calbiochem, Merck KGaA, Darmstadt, Germany) for 24 h. Supernatants from these

cultures were assayed by sandwich ELISA (“Mouse IL-2 ELISA Ready-SET-Go!”, eBioscience, NatuTec GmbH, Frankfurt, Germany) according to the manufacturer's instructions. IL-2 levels were quantified by comparison to standards supplied by the manufacturer.

### Treatment of mice with recombinant IL-2

I $\kappa$ B $\alpha$ -SR Tg or C57BL/6 wild-type mice were intraperitoneally injected with recombinant human (rh) IL-2 (2  $\mu$ g/injection, Proleukin, Novartis, Emeryville, CA, USA) resuspended in PBS or with PBS alone every 8 h for 2 days (total of 6 injections) or every 12 h for 7 days (total of 14 injections). Thymi and spleens were analyzed on day 3 or day 8, respectively, by flow cytometry.

### Mixed radiation bone marrow chimera

Bone marrow cells from the femurs of 6-week old CD45.2<sup>+</sup> I $\kappa$ B $\alpha$ -SR Tg ( $1.5 \times 10^6$ ) and CD45.1<sup>+</sup> C57BL/6 ( $1.5 \times 10^6$ ) wild-type donor mice were mixed at a ratio of 1:1. A total of  $3.0 \times 10^6$  cells were injected intravenously into 6-week old lethally irradiated (950 rads) C57BL/6 Rag1<sup>-/-</sup> recipient mice 24 h after irradiation. Control mice received bone marrow from one genotype only. Ten to twelve weeks after bone marrow reconstitution the mice were sacrificed and analyzed by flow cytometry.

### Treatment of mice with the IKK $\beta$ inhibitor AS602868

AS602868 (kindly provided by Merck Serono S.A., Geneva, Switzerland) is an anilinopyrimidine derivative and adenosine triphosphate (ATP) competitor, which inhibits IKK $\beta$ . AS602868 was dissolved in a saline solution containing 0.5% Carboxymethylcellulose and 0.25% Tween-80 (Sigma-Aldrich, St. Louis, MO, USA) as vehicle. Mice received the IKK $\beta$ -inhibitor AS602868 by oral gavage at a dose of 30 mg/kg twice a day for 7 days. Control mice just received vehicle at the same frequencies. Thymi and spleens were analyzed on day 8 by flow cytometry.

### Statistical analysis

Statistical analyses were performed using either the two-tailed student's *t* test for heteroscedastic samples or Mann-Whitney *U* test for unpaired samples as appropriate and indicated in the figure legends. All statistical analyses were calculated with the *Graph Pad Prism 5.0* software.  $p \leq 0.05$  was considered as statistically significant. Error bars in the figures represent standard deviations (SD).

## Supporting Information

### Figure S1 Inhibition of NF- $\kappa$ B activation in transgenic mice expressing a mutated I $\kappa$ B $\alpha$ as “SuperRepressor” of NF- $\kappa$ B.

(A) Total cell lysates from thymocytes and splenocytes of wild-type (WT) and I $\kappa$ B $\alpha$ -“SuperRepressor” transgenic (I $\kappa$ B-SR Tg) mice were analyzed for expression of the endogenous I $\kappa$ B $\alpha$  (I $\kappa$ B WT) and the slower migrating HA-tagged transgenic I $\kappa$ B $\alpha$  (HA-I $\kappa$ B Tg) by western blot analysis (upper panels).  $\beta$ -actin served as loading control (lower panels). (B) Total thymocytes from WT and I $\kappa$ B-SR Tg mice were either left untreated (–) or stimulated (+) with PMA and ionomycin. Nuclear extracts were prepared and EMSAs were performed using IRDye<sup>700</sup>-labelled oligonucleotides for NF- $\kappa$ B (upper panel), and for Oct-1 (lower panel) as loading control. (C) NF- $\kappa$ B DNA-binding activity in nuclear extracts from thymocytes stimulated as described in (B) was determined by ELISA via binding of NF- $\kappa$ B/Rel proteins to an NF- $\kappa$ B oligonucleotide. The data are representative of three independent experiments using different nuclear extracts prepared from different mice. Mean values and SD were calculated from

triplicates. Student's *t* test for unpaired samples was used for statistical analyses. \*,  $p \leq 0.05$ ; ns, not significant. (TIF)

**Figure S2 IL-2 increases the proportion and total cell number of peripheral Treg cells.** (A) Splenocytes from wild-type (WT) and I $\kappa$ B $\alpha$ -“SuperRepressor” transgenic (I $\kappa$ B-SR Tg) mice were either left untreated (–) or stimulated (+) with PMA and ionomycin as described for Figure 2. The IL-2 concentrations in the supernatants were determined by ELISA. IL-2 secretion from unstimulated cells was below the detection limit. Mean values and SD were calculated from triplicates. Student's *t* test was used for statistical analyses. \*,  $p \leq 0.05$ . (B, C, D) WT and I $\kappa$ B-SR Tg mice were injected either with IL-2 or PBS as described for Figure 2. On day 3, splenocytes were analyzed by flow cytometry. (B) Representative dot plots from one of three experiments are shown. Numbers in the plots represent the percentage of CD25<sup>+</sup>Foxp3<sup>+</sup> cells among CD4SP splenocytes from untreated (PBS) and IL-2 treated mice. (C) Percentages of CD25<sup>+</sup>Foxp3<sup>+</sup> Treg cells among CD4SP cells, as well as absolute numbers of Treg cells in the spleen are displayed. Data were compiled from two independent experiments with three mice per genotype and treatment in each experiment. Each symbol represents an individual mouse. Horizontal bars represent the mean. Mann-Whitney *U*-test was used for statistical analyses. \*,  $p \leq 0.05$ ; \*\*,  $p \leq 0.01$ ; ns, not significant. (TIF)

**Figure S3 Prolonged IL-2 treatment can only partially rescue Treg cell development and homeostasis.** Wild-type (WT) and I $\kappa$ B $\alpha$ -“Superrepressor” transgenic (I $\kappa$ B-SR Tg) mice were injected either with (rh)IL-2 or PBS every 12 h for 7 days. On day 8, the impact on Treg cell development and homeostasis was analyzed by flow cytometry. (A) Percentages of CD25<sup>+</sup>Foxp3<sup>+</sup> cytokine-responsive Treg precursor cells relative to CD4SP thymocytes, as well as their absolute numbers in the thymus. (B) Percentages of CD25<sup>+</sup>Foxp3<sup>+</sup> Treg cells relative to CD4SP thymocytes, as well as absolute numbers of Treg cells in the thymus. (C) Percentages of CD25<sup>+</sup>Foxp3<sup>+</sup> Treg cells among CD4SP cells, as well as absolute numbers of Treg cells in the spleen. (A, B, C) Each symbol represents an individual mouse. Horizontal bars represent the mean. Mann-Whitney *U*-test was used for statistical analyses. \*,  $p \leq 0.05$ ; ns, not significant. (TIF)

**Figure S4 Thymocytes from I $\kappa$ B $\alpha$ -SR Tg mice show no IL-2 signaling defect.** Thymocytes from WT and I $\kappa$ B $\alpha$ -“SuperRepressor” transgenic (I $\kappa$ B-SR Tg) mice were either left untreated (–) or were stimulated with IL-2 (+). Total cell lysates were analyzed for activated, phosphorylated STAT5 $\alpha$  (p-STAT5, upper panel) by western blot analysis. Total STAT5 expression (STAT5, lower panel) served as loading control. The data are representative of three independent experiments using different total cell lysates prepared from different thymocytes cultures. (TIF)

**Figure S5 T and B cell development in mixed bone marrow chimeras.** Mixed bone marrow chimeras were generated as described for Figure 3. (A) Mean percentages + SD of indicated lymphocyte populations in thymus, spleen and

peripheral blood in WT chimeras ( $n = 3$ ) and mixed bone marrow chimeras ( $n = 5$ ). DP, CD4<sup>+</sup>CD8<sup>+</sup>; DN, CD4<sup>+</sup>CD8<sup>–</sup>; SP, single positive, Treg, CD4<sup>+</sup>Foxp3<sup>+</sup> (thymus) or CD4<sup>+</sup>CD25<sup>+</sup>Foxp3<sup>+</sup> (spleen, blood). (B, C, D). Contributions of wild-type- (CD45.1<sup>+</sup>) and I $\kappa$ B $\alpha$ -SR Tg-derived (CD45.2<sup>+</sup>) cells to the given cell populations in thymus (B), spleen (C), and peripheral blood (D) of mixed chimeras. Depicted are the mean percentages + SD (left panels), as well as absolute cell numbers + SD (right panels) of cells contributing to the indicated populations. Data are representative of two independent experiments with similar numbers of mice in each experimental group. Mann-Whitney *U*-test was used for statistical analyses. \*,  $p \leq 0.05$ ; \*\*,  $p \leq 0.01$ ; ns, not significant. (TIF)

**Figure S6 Nuclear NF- $\kappa$ B activity and T cell development in AS602868 treated mice.** Wild-type mice either received the IKK $\beta$ -inhibitor AS602868 or vehicle as described for Figure 4. (A) The NF- $\kappa$ B DNA-binding activity in nuclear extracts from thymocytes and splenocytes of untreated (Vehicle) and treated mice (AS602868) was determined by ELISA via p65 binding to an NF- $\kappa$ B oligonucleotide. Mean values and SD were calculated from pentaplicates. Student's *t* test was used for statistical analyses. \*,  $p \leq 0.05$ ; ns, not significant. (B–E) Single-cell suspensions from thymus and spleen of untreated (Vehicle) and treated mice (AS602868) were analyzed by flow cytometry. Total cell numbers in thymus (B) and spleen (D) are displayed. Each symbol represents an individual mouse. (C, E) Representative dot plots from one of three independent experiments are shown. Numbers in the quadrants indicate the percentages of cells relative to total live cells in the lymphocyte gate (upper panel). Mean Percentages (middle panel) and mean absolute numbers (low panel) of T cell subpopulations in thymus (C) and spleen (E) are depicted. DP, CD4<sup>+</sup>CD8<sup>+</sup>; DN, CD4<sup>+</sup>CD8<sup>–</sup>. (A–E) Data are representative of three independent experiments with equal numbers of mice. Horizontal bars represent the mean (B, D) +SD (A, C, E). Mann-Whitney *U*-test was used for statistical analyses. \*,  $p \leq 0.05$ ; ns, not significant. (TIF)

**Material and Methods S1** Detailed description of the methods *Western blotting*, *Electromobility shift assay* (EMSA), *NF- $\kappa$ B transcription factor assay*. (DOC)

## Acknowledgments

We thank T. Winkler (University of Erlangen-Nürnberg) for kindly providing Rag1-deficient and CD45.1 congenic C57BL/6 mice. We are grateful to Merck Serono, S. A., and especially M. Dreano, for providing us with AS602868, as well as technical advice and critical reading of the manuscript. We thank V. Urbonaviciute and C. Starke for critical reading of the manuscript and their help during its preparation.

## Author Contributions

Conceived and designed the experiments: EG SF REV. Performed the experiments: EG SF MMZ. Analyzed the data: EG SF REV. Contributed reagents/materials/analysis tools: SG GS. Wrote the paper: EG REV. Edited the manuscript: SF GS SG REV.

## References

1. Sakaguchi S, Sakaguchi N, Asano M, Itoh M, Toda M (1995) Immunologic self-tolerance maintained by activated T cells expressing IL-2 receptor  $\alpha$ -chains (CD25). Breakdown of a single mechanism of self-tolerance causes various autoimmune diseases. *J Immunol* 155: 1151–1164.
2. Piccirillo CA, Shevach EM (2001) Cutting edge: control of CD8<sup>+</sup> T cell activation by CD4<sup>+</sup>CD25<sup>+</sup> immunoregulatory cells. *J Immunol* 167: 1137–1140.
3. Thornton AM, Shevach EM (1998) CD4<sup>+</sup>CD25<sup>+</sup> immunoregulatory T cells suppress polyclonal T cell activation in vitro by inhibiting interleukin 2 production. *J Exp Med* 188: 287–296.
4. Asseman C, Mauze S, Leach MW, Coffman RL, Powrie F (1999) An essential role for interleukin 10 in the function of regulatory T cells that inhibit intestinal inflammation. *J Exp Med* 190: 995–1004.

5. Nakamura K, Kitani A, Strober W (2001) Cell contact-dependent immunosuppression by CD4(+)/CD25(+) regulatory T cells is mediated by cell surface-bound transforming growth factor beta. *J Exp Med* 194: 629–644.
6. Powrie F, Carlino J, Leach MW, Mauze S, Coffman RL (1996) A critical role for transforming growth factor-beta but not interleukin 4 in the suppression of T helper type 1-mediated colitis by CD45RB(low) CD4+ T cells. *J Exp Med* 183: 2669–2674.
7. Read S, Malmstrom V, Powrie F (2000) Cytotoxic T lymphocyte-associated antigen 4 plays an essential role in the function of CD25(+)/CD4(+) regulatory cells that control intestinal inflammation. *J Exp Med* 192: 295–302.
8. Takahashi T, Tagami T, Yamazaki S, Ueda T, Shimizu J, et al. (2000) Immunologic self-tolerance maintained by CD25(+)/CD4(+) regulatory T cells constitutively expressing cytotoxic T lymphocyte-associated antigen 4. *J Exp Med* 192: 303–310.
9. Itoh M, Takahashi T, Sakaguchi N, Kuniyasu Y, Shimizu J, et al. (1999) Thymus and autoimmunity: production of CD25+CD4+ naturally anergic and suppressive T cells as a key function of the thymus in maintaining immunologic self-tolerance. *J Immunol* 162: 5317–5326.
10. Chen W, Jin W, Hardegen N, Lei KJ, Li L, et al. (2003) Conversion of peripheral CD4+CD25- naive T cells to CD4+CD25+ regulatory T cells by TGF-beta induction of transcription factor Foxp3. *J Exp Med* 198: 1875–1886.
11. Apostolou I, von Boehmer H (2004) In vivo instruction of suppressor commitment in naive T cells. *J Exp Med* 199: 1401–1408.
12. Kretschmer K, Apostolou I, Hawiger D, Khazaie K, Nussenzweig MC, et al. (2005) Inducing and expanding regulatory T cell populations by foreign antigen. *Nat Immunol* 6: 1219–1227.
13. Knoechel B, Lohr J, Kahn E, Bluestone JA, Abbas AK (2005) Sequential development of interleukin 2-dependent effector and regulatory T cells in response to endogenous systemic antigen. *J Exp Med* 202: 1375–1386.
14. Khattri R, Cox T, Yasayko SA, Ramsdell F (2003) An essential role for Scurfin in CD4+CD25+ T regulatory cells. *Nat Immunol* 4: 337–342.
15. Fontenot JD, Gavin MA, Rudensky AY (2003) Foxp3 programs the development and function of CD4+CD25+ regulatory T cells. *Nat Immunol* 4: 330–336.
16. Hori S, Nomura T, Sakaguchi S (2003) Control of regulatory T cell development by the transcription factor Foxp3. *Science* 299: 1057–1061.
17. Lin W, Haribhai D, Relland LM, Truong N, Carlson MR, et al. (2007) Regulatory T cell development in the absence of functional Foxp3. *Nat Immunol* 8: 359–368.
18. Hill JA, Feuerer M, Tash K, Haxhinasto S, Perez J, et al. (2007) Foxp3 transcription-factor-dependent and -independent regulation of the regulatory T cell transcriptional signature. *Immunity* 27: 786–800.
19. Hori S (2008) Rethinking the molecular definition of regulatory T cells. *Eur J Immunol* 38: 928–930.
20. Bennett CL, Christie J, Ramsdell F, Brunkow ME, Ferguson PJ, et al. (2001) The immune dysregulation, polyendocrinopathy, enteropathy, X-linked syndrome (IPEX) is caused by mutations of FOXP3. *Nat Genet* 27: 20–21.
21. Wildin RS, Ramsdell F, Peake J, Faravelli F, Casanova JL, et al. (2001) X-linked neonatal diabetes mellitus, enteropathy and endocrinopathy syndrome is the human equivalent of mouse scurfy. *Nat Genet* 27: 18–20.
22. Lyon MF, Peters J, Glenister PJ, Ball S, Wright E (1990) The scurfy mouse mutant has previously unrecognized hematological abnormalities and resembles Wiskott-Aldrich syndrome. *Proc Natl Acad Sci U S A* 87: 2433–2437.
23. Godfrey VL, Wilkinson JE, Rinchik EM, Russell LB (1991) Fatal lymphoreticular disease in the scurfy (sf) mouse requires T cells that mature in a sf thymic environment: potential model for thymic education. *Proc Natl Acad Sci U S A* 88: 5528–5532.
24. Bensinger SJ, Bandeira A, Jordan MS, Caton AJ, Laufer TM (2001) Major histocompatibility complex class II-positive cortical epithelium mediates the selection of CD4(+)/25(+) immunoregulatory T cells. *J Exp Med* 194: 427–438.
25. Jordan MS, Boesteanu A, Reed AJ, Petrone AL, Hohenbeck AE, et al. (2001) Thymic selection of CD4+CD25+ regulatory T cells induced by an agonist self-peptide. *Nat Immunol* 2: 301–306.
26. Apostolou I, Sarukhan A, Klein L, von Boehmer H (2002) Origin of regulatory T cells with known specificity for antigen. *Nat Immunol* 3: 756–763.
27. Salomon B, Lenschow DJ, Rhee L, Ashourian N, Singh B, et al. (2000) B7/CD28 costimulation is essential for the homeostasis of the CD4+CD25+ immunoregulatory T cells that control autoimmune diabetes. *Immunity* 12: 431–440.
28. Tang Q, Henriksen KJ, Boden EK, Tooley AJ, Ye J, et al. (2003) Cutting edge: CD28 controls peripheral homeostasis of CD4+CD25+ regulatory T cells. *J Immunol* 171: 3348–3352.
29. Tai X, Cowan M, Feigenbaum L, Singer A (2005) CD28 costimulation of developing thymocytes induces Foxp3 expression and regulatory T cell differentiation independently of interleukin 2. *Nat Immunol* 6: 152–162.
30. Malek TR, Yu A, Vincek V, Scibelli P, Kong L (2002) CD4 regulatory T cells prevent lethal autoimmunity in IL-2Rbeta-deficient mice. Implications for the nonredundant function of IL-2. *Immunity* 17: 167–178.
31. Bayer AL, Yu A, Adeegbe D, Malek TR (2005) Essential role for interleukin-2 for CD4(+)/CD25(+) T regulatory cell development during the neonatal period. *J Exp Med* 201: 769–777.
32. Fontenot JD, Rasmussen JP, Gavin MA, Rudensky AY (2005) A function for interleukin 2 in Foxp3-expressing regulatory T cells. *Nat Immunol* 6: 1142–1151.
33. Burchill MA, Yang J, Vang KB, Farrar MA (2007) Interleukin-2 receptor signaling in regulatory T cell development and homeostasis. *Immunol Lett* 114: 1–8.
34. Vang KB, Yang J, Mahmud SA, Burchill MA, Vegoe AL, et al. (2008) IL-2, -7, and -15, but not thymic stromal lymphopoietin, redundantly govern CD4+Foxp3+ regulatory T cell development. *J Immunol* 181: 3285–3290.
35. Burchill MA, Goetz CA, Pric M, O'Neil JJ, Harmon JR, et al. (2003) Distinct effects of STAT5 activation on CD4+ and CD8+ T cell homeostasis: development of CD4+CD25+ regulatory T cells versus CD8+ memory T cells. *J Immunol* 171: 5853–5864.
36. Antov A, Yang L, Vig M, Baltimore D, Van Parijs L (2003) Essential role for STAT5 signaling in CD25+CD4+ regulatory T cell homeostasis and the maintenance of self-tolerance. *J Immunol* 171: 3435–3441.
37. Yao Z, Kanno Y, Kerenyi M, Stephens G, Durant L, et al. (2007) Nonredundant roles for Stat5a/b in directly regulating Foxp3. *Blood* 109: 4368–4375.
38. Lio CW, Hsieh CS (2008) A two-step process for thymic regulatory T cell development. *Immunity* 28: 100–111.
39. Burchill MA, Yang J, Vang KB, Moon JJ, Chu HH, et al. (2008) Linked T cell receptor and cytokine signaling govern the development of the regulatory T cell repertoire. *Immunity* 28: 112–121.
40. Gerondakis S, Siebenlist U (2010) Roles of the NF-kappaB pathway in lymphocyte development and function. *Cold Spring Harb Perspect Biol* 2: a000182.
41. Hayden MS, Ghosh S (2008) Shared principles in NF-kappaB signaling. *Cell* 132: 344–362.
42. Vallabhapurapu S, Karin M (2009) Regulation and function of NF-kappaB transcription factors in the immune system. *Annu Rev Immunol* 27: 693–733.
43. Sun Z, Arendt CW, Ellmeier W, Schaeffer EM, Sunshine MJ, et al. (2000) PKC-theta is required for TCR-induced NF-kappaB activation in mature but not immature T lymphocytes. *Nature* 404: 402–407.
44. Hara H, Wada T, Bakal C, Kozieradzki I, Suzuki S, et al. (2003) The MAGUK family protein CARD11 is essential for lymphocyte activation. *Immunity* 18: 763–775.
45. Egawa T, Albrecht B, Favier B, Sunshine MJ, Mirchandani K, et al. (2003) Requirement for CARMA1 in antigen receptor-induced NF-kappa B activation and lymphocyte proliferation. *Curr Biol* 13: 1252–1258.
46. Ruland J, Duncan GS, Elia A, del Barco Barrantes I, Nguyen L, et al. (2001) Bcl10 is a positive regulator of antigen receptor-induced activation of NF-kappaB and neural tube closure. *Cell* 104: 33–42.
47. Ruland J, Duncan GS, Wakeham A, Mak TW (2003) Differential requirement for Malt1 in T and B cell antigen receptor signaling. *Immunity* 19: 749–758.
48. Gupta S, Manicassamy S, Vasu C, Kumar A, Shang W, et al. (2008) Differential requirement of PKC-theta in the development and function of natural regulatory T cells. *Mol Immunol* 46: 213–224.
49. Schmidt-Suppran M, Tian J, Grant EP, Pasparakis M, Mach R, et al. (2004) Differential dependence of CD4+CD25+ regulatory and natural killer-like T cells on signals leading to NF-kappaB activation. *Proc Natl Acad Sci U S A* 101: 4566–4571.
50. Barnes MJ, Krebs P, Harris N, Eidenschenck C, Gonzalez-Quintanilla R, et al. (2009) Commitment to the regulatory T cell lineage requires CARMA1 in the thymus but not in the periphery. *PLoS Biol* 7: e51.
51. Molinero LL, Yang J, Gajewski T, Abraham C, Farrar MA, et al. (2009) CARMA1 controls an early checkpoint in the thymic development of FoxP3+ regulatory T cells. *J Immunol* 182: 6736–6743.
52. Zheng Y, Vig M, Lyons J, Van Parijs L, Beg AA (2003) Combined deficiency of p50 and cRel in CD4+ T cells reveals an essential requirement for nuclear factor kappaB in regulating mature T cell survival and in vivo function. *J Exp Med* 197: 861–874.
53. Isomura I, Palmer S, Grumont RJ, Bunting K, Hoyne G, et al. (2009) c-Rel is required for the development of thymic Foxp3+ CD4 regulatory T cells. *J Exp Med* 206: 3001–3014.
54. Deenick EK, Elford AR, Pellegrini M, Hall H, Mak TW, et al. (2010) c-Rel but not NF-kappaB1 is important for T regulatory cell development. *Eur J Immunol* 40: 677–681.
55. Schmidt-Suppran M, Courtois G, Tian J, Coyle AJ, Israel A, et al. (2003) Mature T cells depend on signaling through the IKK complex. *Immunity* 19: 377–389.
56. Srisankarajah S, Belich MP, Papoutsopoulou S, Janzen J, Tybulewicz V, et al. (2009) Proteolysis of NF-kappaB1 p105 is essential for T cell antigen receptor-induced proliferation. *Nat Immunol* 10: 38–47.
57. Long M, Park SG, Strickland I, Hayden MS, Ghosh S (2009) Nuclear factor-kappaB modulates regulatory T cell development by directly regulating expression of Foxp3 transcription factor. *Immunity* 31: 921–931.
58. Voll RE, Jimi E, Phillips RJ, Barber DF, Rincon M, et al. (2000) NF-kappa B activation by the pre-T cell receptor serves as a selective survival signal in T lymphocyte development. *Immunity* 13: 677–689.
59. Lee AJ, Wu X, Cheng H, Zhou X, Cheng X, et al. (2010) CARMA1 regulation of regulatory T cell development involves modulation of interleukin-2 receptor signaling. *J Biol Chem* 285: 15696–15703.
60. Antony PA, Paulos CM, Ahmadzadeh M, Akpinarli A, Palmer DC, et al. (2006) Interleukin-2-dependent mechanisms of tolerance and immunity in vivo. *J Immunol* 176: 5255–5266.

61. Kontgen F, Grumont RJ, Strasser A, Metcalf D, Li R, et al. (1995) Mice lacking the c-rel proto-oncogene exhibit defects in lymphocyte proliferation, humoral immunity, and interleukin-2 expression. *Genes Dev* 9: 1965–1977.
62. Boothby MR, Mora AL, Scherer DC, Brockman JA, Ballard DW (1997) Perturbation of the T lymphocyte lineage in transgenic mice expressing a constitutive repressor of nuclear factor (NF)- $\kappa$ B. *J Exp Med* 185: 1897–1907.
63. Frelin C, Imbert V, Griessinger E, Loubat A, Dreano M, et al. (2003) AS602868, a pharmacological inhibitor of IKK2, reveals the apoptotic potential of TNF- $\alpha$  in Jurkat leukemic cells. *Oncogene* 22: 8187–8194.
64. Nishioka T, Shimizu J, Iida R, Yamazaki S, Sakaguchi S (2006) CD4+CD25+Foxp3+ T cells and CD4+CD25-Foxp3+ T cells in aged mice. *J Immunol* 176: 6586–6593.
65. Zhao L, Sun L, Wang H, Ma H, Liu G, et al. (2007) Changes of CD4+CD25+Foxp3+ regulatory T cells in aged Balb/c mice. *J Leukoc Biol* 81: 1386–1394.
66. Zhou P, Balin SJ, Mashayekhi M, Hwang KW, Palucki DA, et al. (2005) Transplantation tolerance in NF- $\kappa$ B-impaired mice is not due to regulation but is prevented by transgenic expression of Bcl-xL. *J Immunol* 174: 3447–3453.
67. D'Cruz LM, Klein L (2005) Development and function of agonist-induced CD25+Foxp3+ regulatory T cells in the absence of interleukin 2 signaling. *Nat Immunol* 6: 1152–1159.
68. Setoguchi R, Hori S, Takahashi T, Sakaguchi S (2005) Homeostatic maintenance of natural Foxp3(+) CD25(+) CD4(+) regulatory T cells by interleukin (IL)-2 and induction of autoimmune disease by IL-2 neutralization. *J Exp Med* 201: 723–735.
69. Lai JH, Horvath G, Subleski J, Bruder J, Ghosh P, et al. (1995) RelA is a potent transcriptional activator of the CD28 response element within the interleukin 2 promoter. *Mol Cell Biol* 15: 4260–4271.
70. Mora A, Youn J, Keegan A, Boothby M (2001) NF- $\kappa$ B/Rel participation in the lymphokine-dependent proliferation of T lymphoid cells. *J Immunol* 166: 2218–2227.
71. Ruan Q, Kameswaran V, Tone Y, Li L, Liou HC, et al. (2009) Development of Foxp3(+) regulatory t cells is driven by the c-Rel enhanceosome. *Immunity* 31: 932–940.
72. Bettelli E, Dastrange M, Oukka M (2005) Foxp3 interacts with nuclear factor of activated T cells and NF- $\kappa$ B to repress cytokine gene expression and effector functions of T helper cells. *Proc Natl Acad Sci U S A* 102: 5138–5143.
73. Jana S, Jailwala P, Haribhai D, Waukau J, Glisic S, et al. (2009) The role of NF- $\kappa$ B and Smad3 in TGF- $\beta$ -mediated Foxp3 expression. *Eur J Immunol* 39: 2571–2583.
74. Visekruna A, Huber M, Hellhund A, Bothur E, Reinhard K, et al. (2010) c-Rel is crucial for the induction of Foxp3(+) regulatory CD4(+) T cells but not T(H)17 cells. *Eur J Immunol* 40: 671–676.
75. Liu H, Leung BP (2006) CD4+CD25+ regulatory T cells in health and disease. *Clin Exp Pharmacol Physiol* 33: 519–524.
76. Lounnas N, Frelin C, Gonthier N, Colosetti P, Sirvent A, et al. (2009) NF- $\kappa$ B inhibition triggers death of imatinib-sensitive and imatinib-resistant chronic myeloid leukemia cells including T315I Bcr-Abl mutants. *Int J Cancer* 125: 308–317.
77. Beraza N, Malato Y, Vander Borghet S, Liedtke C, Wasmuth HE, et al. (2008) Pharmacological IKK2 inhibition blocks liver steatosis and initiation of non-alcoholic steatohepatitis. *Gut* 57: 655–663.
78. Greten FR, Arkan MC, Bollrath J, Hsu LC, Goode J, et al. (2007) NF- $\kappa$ B is a negative regulator of IL-1 $\beta$  secretion as revealed by genetic and pharmacological inhibition of IKK $\beta$ . *Cell* 130: 918–931.
79. Sutton C, Brereton C, Keogh B, Mills KH, Lavelle EC (2006) A crucial role for interleukin (IL)-1 in the induction of IL-17-producing T cells that mediate autoimmune encephalomyelitis. *J Exp Med* 203: 1685–1691.
80. Chung Y, Chang SH, Martinez GJ, Yang XO, Nurieva R, et al. (2009) Critical regulation of early Th17 cell differentiation by interleukin-1 signaling. *Immunity* 30: 576–587.
81. McIntyre KW, Shuster DJ, Gillooly KM, Dambach DM, Pattoli MA, et al. (2003) A highly selective inhibitor of I  $\kappa$ B kinase, BMS-345541, blocks both joint inflammation and destruction in collagen-induced arthritis in mice. *Arthritis Rheum* 48: 2652–2659.
82. Greve B, Weissert R, Hamdi N, Bettelli E, Sobel RA, et al. (2007) I  $\kappa$ B kinase 2/ $\beta$  deficiency controls expansion of autoreactive T cells and suppresses experimental autoimmune encephalomyelitis. *J Immunol* 179: 179–185.
